# Supplementary material
Source: Springer Nature journal article supplement (https://www.springermedizin.de/resource/supplementary/13063_2012_1204_MOESM2_ESM.pdf/9620216)

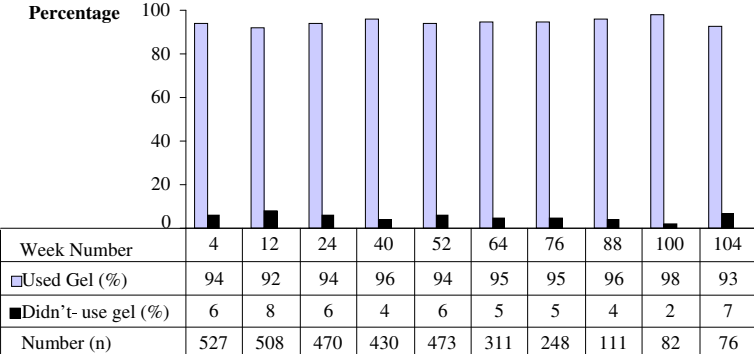

Used Gel (%)
  Did not use gel (%)

Supplement: MOESM2 [file 9620216]
